# Supplementary material for: Human liver segments: role of cryptic liver lobes and vascular physiology in the development of liver veins and left-right asymmetry
Source: PubMed Central journal article supplement (PMC5719430; doi:10.1038/s41598-017-16840-1), 2017-12-07
Supplement: 41598_2017_16840_MOESM1_ESM.pdf [file 41598_2017_16840_MOESM1_ESM.pdf]

# Human liver segments: role of cryptic liver lobes and vascular physiology in the development of liver veins and left-right asymmetry

Jill P.J.M. Hikspoors, Mathijs M.J.P. Peeters, Nutmethee Kruepunga, Hayelom K. Mekonen, Greet M.C. Mommen, S. Eleonore Köhler, Wouter H. Lamers

Supplemental Figure 1:

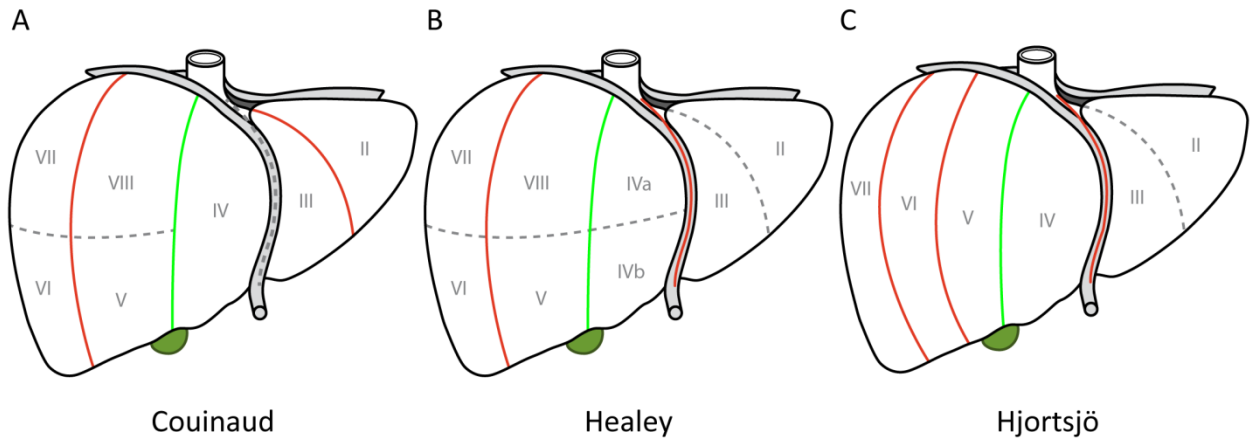

**Segmentation models.** Panels A-C show Couinaud's, Healey's and Hjortsjö's concepts, respectively. Cantlie's line (green) subdivides the liver into a right and left hemi-liver in all models. Whether the falciform ligament subdivides the left hemi-liver into two segments (## 3,4 in A: grey interrupted line) or sectors (## 3,4 in B,C: red line) is debated. In Healey's model the medial sector (#4) has 2 segments (#4a,b). In all models, the right hemi-liver is subdivided into an anterior and posterior sector, but Hjortsjö's model also has intermediate sector. Couinaud's and Healey's models have 4 segments in the right hemi-liver.

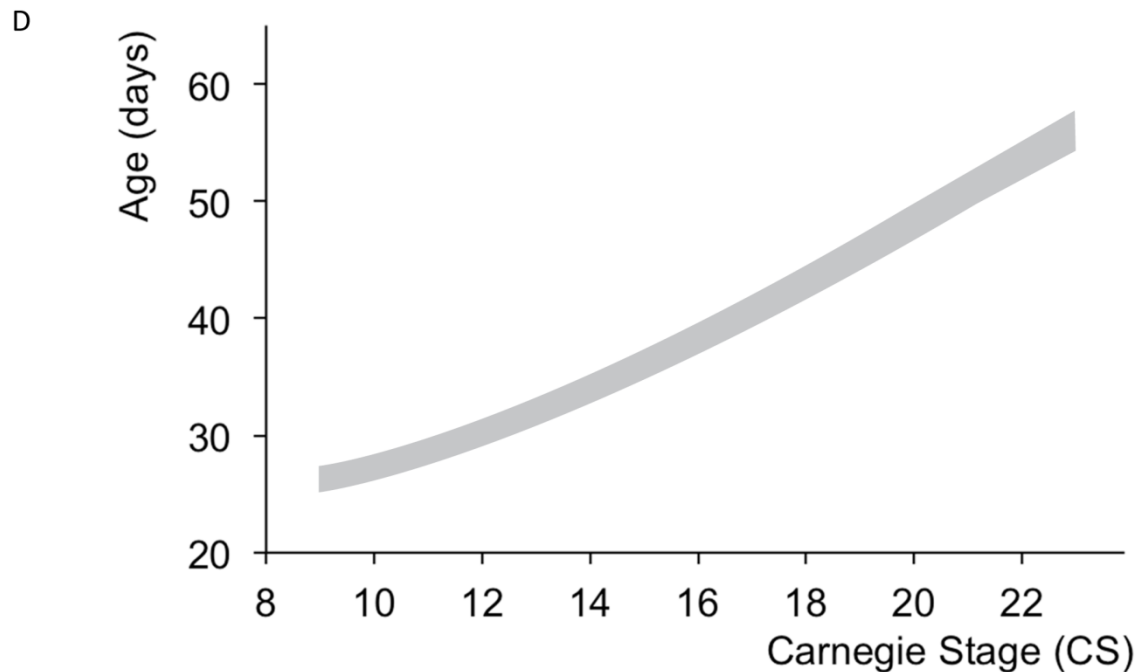

**Correlation between Carnegie Stages and embryonic ages.** (adapted from Table 1 (O'Rahilly et al. 2010). The lowest and highest age per Carnegie Stage is given in panel D.

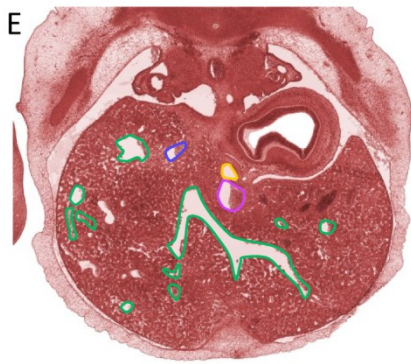

Histology

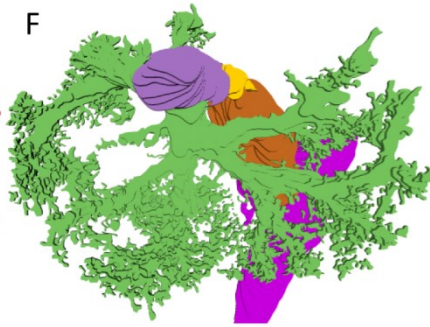

Amira 3D-reconstruction

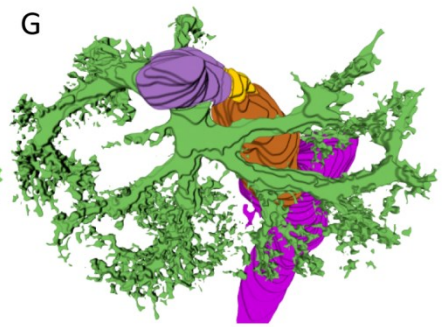

Smoothed Amira reconstruction

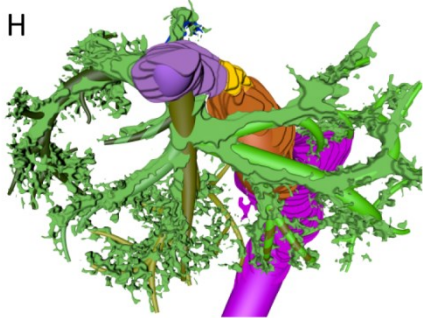

Overlay

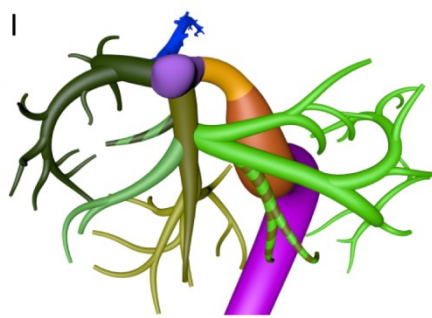

Cinema 4D model

**From sections via Amira 3D to Cinema 4D.** The individual sections (E) used for the Amira 3D reconstruction are still visible (F). Panel G shows a smoothed visualization. Simultaneous visualization of Amira 3D and Cinema 4D, and the remodeled Cinema model are shown in panels H and I.
